# Supplementary material
Source: Springer Nature journal article supplement (https://www.springermedizin.de/resource/supplementary/13046_2008_123_MOESM2_ESM.pdf/9661676)

[H]

[R]

[L]

SP: 44.4mm  
ST: 4.0mm  
C416  
W832  
Not for diagnostic use

[F]

GE MEDICAL SYSTEMS

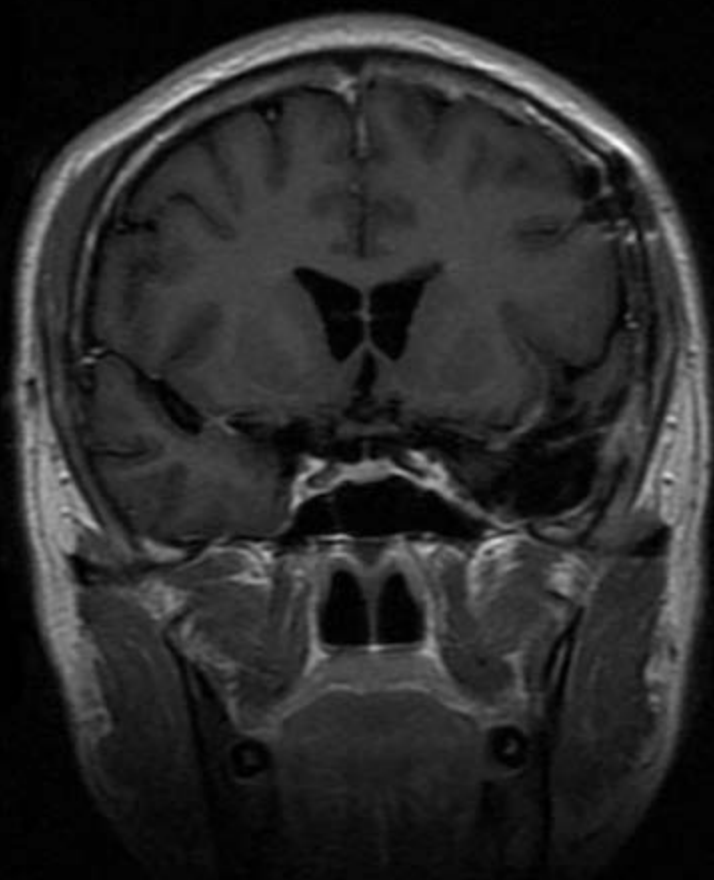

Supplement: MOESM2 [file 9661676]
